# Supplementary material for: Experiments related to the synthesis and analysis of a hydrazine library †
Source: Royal Society of Chemistry journal article supplement (doi:10.1039/b000139m), 2000-01-01
Supplement: b000139m.doc [file b000139m.doc]

# Supplementary data

## Experiments related to the synthesis and analysis of a hydrazine library

Ulf Ragnarsson,* Bengt Fransson and Leif Grehn

Department of Biochemistry, University of Uppsala, Biomedical Center, PO Box 576, SE-751 21, Uppsala, Sweden

**Table ** Structures, retention times and correction factors for components determined by HPLC

|  | |  |  |  |  |
| --- | --- | --- | --- | --- | --- |
| R1 | R2 | Compd | *t*R*a*/min | Units*b*/  10-13 mol‑1 | Comments |
| H | Ts | A | 11.0 | 2.83 | Ref. 4 |
| Me | Ts | **1a** | 16.5 | 3.18 | Ref. 4 |
| *i*-Pr | Ts | **1b** | 25.5 | 3.96 | Experimental |
| Bn | Ts | **1c** | 31.8 | 3.56 | Ref. 4 |
| EtOCOCH2 | Ts | **1d** | 18.3 | 2.99 | Ref. 4 |
| Et | Ts | **1e** | 20.5 | 3.18 | New compd |
| Pr | Ts | **1f** | 24.0 | 3.29 | New compd |
| Me | H | **2a** | 6.0 | N.d. | Ref. 4 |
| *i*-Pr | H | **2b** | 7.8 | 0.92 | Experimental |
| Bn | H | **2c** | 10.6 | 1.58 | Ref. 4 |
| Me | EtOCOCH2 | **3aa** | 10.1 | 0.85 | Table  |
| Me | 4-ClC6H4CH2 | **3ab** | 19.3 | 1.70 | Table  |
| Me | 4-BrC6H4CH2 | **3ac** | 20.7 | 1.75 | Table  |
| *i*-Pr | EtOCOCH2 | **3ba** | 13.5 | 0.91 | Experimental |
| *i*-Pr | 4-ClC6H4CH2 | **3bb** | 31.2 | 1.58 | Table  |
| *i*-Pr | 4-BrC6H4CH2 | **3bc** | 32.5 | 1.82 | Table  |
| Bn | EtOCOCH2 | **3ca** | 18.9 | 1.56 | Table  |
| Bn | 4-ClC6H4CH2 | **3cb** | 38.0 | 2.66 | Table  |
| Bn | 4-BrC6H4CH2 | **3cc** | 40.9 | 2.75 | Table  |
|  | |  |  |  |  |
| R3 | R4 | Compd | *t*R*a*/min | Units*b*/  10-13 mol‑1 | Comments |
| H | Z | **4** | 5.0 | N.d. | Ref. 11 |
| 4-FC6H4CO | Z | **5a** | 45.2 | 4.42 | Ref. 11 |
| 1-C10H7CO | Z | **5b** | 115.9 | 4.30 |  |
| 4-FC6H4CO | H | **6a** | 3.5 | N.d. | Ref. 11 |
| 1-C10H7CO | H | **6b** | 20.6 | 13.4 |  |
| 4-FC6H4CO | BzNHCO | **7aa** | 13.3 | 12.9 | New compd |
| 4-FC6H4CO | TsNHCO | **7ab** | 20.5 | 5.42 | Ref. 11 |
| 1-C10H7CO | BzNHCO | **7ba** | 32.9 | 13.2 | Experimental |
| 1-C10H7CO | TsNHCO | **7bb** | 48.5 | 5.57 | New compd |
| *a* For compounds **1**-**3** HPLC system 1 and for **4**-**7** system 2 (Experimental section) were used. *b* The detector was set at 277 nm for **A** and **1** and 258 nm for **2**-**7**. | | | | | |

## Expanded experimental

**General synthetic procedures**

All mps were measured on a Gallenkamp apparatus and are uncorrected. All solvents used as reaction media were analytical grade and further dried over molecular sieves (4A). All reactions were performed under argon and the glassware was dried in flame immediately before use. TLC analyses were carried out on 0.25 mm thick precoated silica plates (Merck Fertigplatten Kieselgel 60F254) with mobile phases toluene/MeCN 2:1 (A), light petroleum, bp 40-60 C/Et2O 2:1 (B), CH2Cl2/acetone/HOAc 80:10:1 (C) and CH2Cl2/MeOH 9:1 (D). TLC spots were visualized under UV light or, preferably, by alcoholic phosphomolybdic acid spray and subsequent drying at 110 C (bluish spots). Preparative chromatography was carried out on Kieselgel 60 (70-230 mesh). 1H and 13C NMR spectra were recorded with a JEOL JMN Ex 400 spectrometer in 5% solution at 25 C. All shifts are given in  ppm using H(TMS)=0 and C(CDCl3/DMSO-*d6*)=77.02/39.50, respectively, as internal references. Elemental analyses on all crystalline compounds were performed by Mikro Kemi AB (Uppsala).

**General analytical procedures**

Equipment: The liquid chromatographic system consisted of two Shimadzu pumps Model 10 AD and a Shimadzu variable wavelength detector Model SPD 10 A with a 8 L flow cell including a Shimadzu integrator Model C-R3A. The solvent was connected to a Shimadzu degassing unit Model DGU-2A (all from Shimadzu, Kyoto 604, Japan). The syringe loading injector was a Rheodyne Model 7125 (Rheodyne, Cotati, CA, U.S.A.). Column: Waters Spherisorb C8, 3 m (100x4.6 mm) with a 10 mm integral reversed phase C8, 5 m guard column. Mobile phase: (HPLC system 1, for **A** and **1-3**) MeCN/acetate 0.05 M, pH=4.35 (60:40) and (system 2, for **4-7**) MeCN/phosphate 0.05 M, pH=2.5 (28:72). Flow rate: 0.5 cm3/min (for **A** and **1-3**), 1.5 cm3/min (for **4** and **5**) and 1.0 cm3/min (for **6** and **7**). Detection wavelength: 277 nm (for **A** and **1**) and 258 nm (for **2**-**7**). Sensitivity: 0.04 AUFS. 5 L of sample in MeCN injected.

**Optimization of separation conditions**

The optimization of the separation conditions was performed with **1a-c** and **1e** using MeCN/acetate buffers. Initially the pH was varied in the range 3.35-5.35 and two ionic strengths, 0.05 and 0.1 M, were tested without detectable influence on the resolution, as a result of which 0.05 M buffer, pH=4.35 (HPLC system 1 with 60% MeCN), was chosen. It was also applicable for separation of **2** and **3**. A similar system was *not* suitable for the ureas **7**, causing severe tailing, which could be eliminated at lower pH. As a result a 0.05 M phosphate buffer, pH=2.5 (system 2), was used and applied for compounds **4**-**7**. Much less modifier was then also required.

**2-Boc-1-ethyl-2-Ts-1-Z-hydrazine (1e)**

Synthesized in quantitative yield by EtI-mediated ethylation of **A** under PTC conditions by analogy with the procedure for **1a**;4 pure by TLC (A,B). Chromatography on silica (CH2Cl2/Et2O 15:1) gave a colourless, viscous oil; 1H NMR (400 MHz, CDCl3, major/minor conformer)  1.286/1.295 (2t, *J*=7.2 Hz, 3 H), 1.30/1.32 (2s, 9 H), 2.34/2.43 (2s, 3 H), 3.72/3.87 (2compl. m, 2 H), 4.91, 5.19/5.20, 5.26 (2ABq, *J*=12.3 Hz, 2 H), 7.07-7.10 and 7.22-7.38 (compl. sign., 7 H), 7.80/8.01 (2d, *J*=8.4 Hz, 2 H); 13C NMR (100.4 MHz, CDCl3, major/minor conformer)  12.79/12.20, 21.61/21.70, 27.73/27.76, 47.09/47.80, 68.14/68.40, 85.20, 127.84, 128.00, 128.08, 128.27, 128.29, 128.55, 128.91, 128.99, 129.39, 129.66, 135.23, 135.37, 135.62, 135.79, 144.79, 149.78/149.75, 154.62/155.19.

**2-Boc-1-propyl-2-Ts-1-Z-hydrazine (1f)**

Obtained from **A** and PrI according to the standard procedure.4 In this case one additional equiv. of PrI and prolonged reaction time was required for complete reaction. Workup afforded chromatographically (A) pure product in 91% yield as a colourless oil which soon solidified; mp 51-52 C (from light petroleum; 20 cm3/g at -20 C; 1H NMR (400 MHz, CDCl3, major/minor conformer)  0.96/0.93 (2t, *J*7.5 Hz, 3 H), 1.29/1.32 (2s, 9 H), 1.75 (pert. m, 2 H), 2.34/2.43 (2s, 3 H), 3.61/3.71 (2 pert. m, 2 H), 4.92, 5.20/5.21, 5.26 (2ABq, *J*=12.3/12.5 Hz, together 2 H), 7.08-7.11 and 7.22-7.38 (compl. sign., 2 + 5 H), 7.80/8.01 (2d, *J*=8.4 Hz, 2 H); 13C NMR (100.4 MHz, CDCl3, major/minor conformer)  11.24/11.25, 20.35/20.84, 21.60/21.68, 27.72/27.76, 54.07/54.75, 68.20/68.41, 85.21, 127.78, 128.03, 128.09, 128.24, 128.29, 128.53, 128.90, 128.96, 129.39, 129.69, 135.25, 135.45, 135.67, 135.82, 144.77, 149.71/149.67, 154.85/155.32. Anal. Found: C, 59.7; H, 6.6; N, 6.0. Calc. for C23H30N2O6S: C, 59.72; H, 6.54; N, 6.06.

**2-Ethyl-1-methyl-2-(1-naphthoyl)-1-Z-hydrazine (5b)**

Prepared from crude **4** and 1-naphthoyl chloride in dry pyridine according to a previously published procedure for **5a**.11 Crude, chromatographically pure (A,B) **5b** was obtained as a pale yellow oil in 98% yield in a 5 mmol run. Attempted crystallization from light petroleum at -20 C failed. 1H NMR (400 MHz, CDCl3, major/minor conformer)  1.04/1.08/1.33/1.38 (4t, 3 H), 3.40/3.41/2.83/2.78 (4s) and 3.19-3.37, 3.68-3.84, 4.02-4.16 (compl. sign., together 5 H), 4.88-4.96 (compl. sign.), 5.08/5.11 (2s) and 5.30 (pert. sign., together 2 H), 6.89-8.35 (compl. sign., 12 H); 13C NMR (100.4 MHz, CDCl3, major/minor conformer)  13.32/12.88/13.43/13.02, 38.19/37.02/ 38.04/38.88, 45.72/45.82/42.66/42.21, 68.06/68.25/68.58/67.74, 122.65, 123.56, 124.50, 124.88, 126.14, 126.47, 126.92, 127.36, 127.63, 127.85, 128.16, 128.35, 128.54, 128.63, 129.22, 129.44, 129.55, 133.21, 133.29, 133.43, 135.32, 135.73, 135.97, 156.59/156.21/ 155.02/155.19, 168.99/172.29/172.58/169.50.

**1-Benzoylcarbamoyl-2-ethyl-2-(4-fluorobenzoyl)-1-methylhydrazine (7aa)**

Prepared from **6a** and BzNCO as described for **7ab**.11 The usual workup afforded chromatographically almost pure (C, D) **7aa** in 92% yield in a 1 mmol run; mp 131.5-132.5 C (from Et2O/light petroleum 1:1; 20 cm3/g at -20 C). 1H NMR (400 MHz, CDCl3, main conformer)  1.34 (t, *J*=7.0 Hz, 3 H), 3.12 (s, 3 H), 3.74 (m, 2 H), 7.08 (pert. t, *J*8.6 Hz, 2 H), 7.41-7.59 (compl. sign., 5 H), 7.75 (pert. d, *J*8 Hz, 2 H), 8.91 (br. s, 1 H); 13C NMR (100.4 MHz, CDCl3, main conformer)  12.79, 36.3, 44.48, 115.74 (d, *J*=22.3 Hz), 127.32, 127.78, 128.45, 128.66, 129.31, 129.40, 130.05, 131.82, 132.84, 133.13, 152.55, 164.10 (d, *J*=251.8 Hz), 166.22, 171.15. Anal. Found: C, 62.6; H, 5.0; N, 12.1. Calc. for C18H18FN3O3: C, 62.97; H, 5.28; N, 12.24.

**2-Ethyl-1-methyl-2-(1-naphthoyl)-1-tosylcarbamoylhydrazine (7bb)**

The title compound was synthesized by treatment of **6b** with a small excess of TsNCO in dry CH2Cl2 by analogy with **7ab**.11 A similar workup provided crude, essentially pure (C,D) **7bb** in 94 % yield in a 1 mmol run; white, microcrystalline solid with mp 207-208 C (dec; from CHCl3/CCl4 1:1, 40 cm3/g at -20 C). 1H NMR (400 MHz, DMSO-*d*6, major/minor conformer)  1.24/1.04/0.87 (3 pert. t, 3 H), 2.40/2.42/2.37 (3s, partly obscured, 3 H), 2.85, 3.07, 3.13, 3.41, 3.58, 3.69, 3.97 (br. sign., partly obscured, 5 H), 7.00-8.08 (compl. sign., 11 H), 11.92/11.48/11.1 (br. sign., 1 H); 13C NMR (100.4 MHz, DMSO-*d*6)  12.55/11.64/12.84/12.35/13.63/13.93, 21.04/20.85, 34.62, 35.32, 36.19, 36.70, 37.60, 38.28, 42.17, 43.80, 45.07, 45.77, 121.70, 122.25, 123.53, 123.63, 124.39, 124.80, 124.98, 125.19, 125.58, 125.80, 126.22, 126.46, 126.60, 126.75, 127.02, 127.51, 128.04, 128.35, 129.24, 129.75, 132.64, 132.92, 133.16, 136.94, 137.31, 141.41, 141.78, 143.61, 151.97/151.78/153.17, 171.36/167.70/169.16/ 170.71. Anal. Found: C, 62.0; H, 5.8; N, 9.7. Calc. for C22H23N3O4S: C, 62.10; H, 5.45; N, 9.88.

**Table  Selected properties of reference compounds** 3

| Compd | Method | Yield*a* (%) | NMR*b*,*c* (ppm, CDCl3, 400/100.4 MHz, ~25 °C) | |
| --- | --- | --- | --- | --- |
| **3aa** | Ref. 11 | 56 | 1.27 (t, 3, 3 H), 1.36 (s, 4, 9 H), 3.22 (s, 3, 3 H), 3.70, 4.69 (ABq, *J*=17.9 Hz, 4, 2 H), 4.19 (q, 4, 2 H), 5.09, 5.21 (ABq, *J*=12.3 Hz, 4, 2 H) | 14.08 (2), 28.02 (2), 37.22 (4), 51.69 (4), 61.22 (3), 67.84 (3), 81.96 (4), 154.07 (4), 156.03 (3), 169.18 (4) |
| **3ab** | Ref. 11 | 99 | 1.37 (s, 4, 9 H), 2.84 (s, 4, 3 H), 4.27, 4.76 (ABq, *J*=14.7 Hz, 3, 2 H), 5.01, 5.13 (ABq, *J*=12.1 Hz, 3, 2 H)*d* | 28.10 (3), 37.12 (4), 51.61 (4), 67.82 (3), 81.54 (4), 154.39 (4), 156.18 (4)*e* |
| **3ac** | Typical procedure | 91 | 1.37 (s, 4, 9 H), 2.84 (s, 4, 3 H), 4.26, 4.74 (ABq, *J*=14.5 Hz, 4, 2 H), 5.00, 5.12 (ABq, *J*=12.2 Hz, 4, 2 H) | 28.11 (3), 37.12 (4), 51.70 (4), 67.85 (3), 81.57 (4), 154.40 (4), 156.19 (4) |
| **3ba** | Typical procedure | 95 | 1.21-1.30 (sign. overlap, 9 H), 1.34 (s, 3, 9 H), 3.51(d, 2, 1 H), 4.21 (q, 2 H), 4.36-4.72 and 5.08-5.28 (compl. sign., 2 H + 2 H) | 14.08 (2), 18.98 (3), 20.49 (3), 27.92, 51.22 (2), 55.40 (4), 61.03 (2), 67.62 (2), 82.05 (3), 154.63 (3), 155.59 (2), 168.68 (3) |
| **3bb** | Typical procedure | 95 | 1.06 (d, 4, 6 H), 1.35 (s, 3, 9 H), 4.12 (m, 3, 1 H), 4.31,4.74 (ABq, *J*=15.0 Hz, 3, 2 H), 4.88, 5.10 (ABq, *J*=12.2 Hz, 3, 2 H) | 19.25 (3), 21.47 (3), 28.03 (2), 52.06 (2), 54.95 (2), 67.46 (2), 81.64 (2), 154.94 (3), 155.94 (2) |
| **3bc** | Typical procedure | 89 | 1.06 (d, 4, 6 H), 1.35 (s, 3, 9 H), 4.13 (m, 3, 1 H), 4.30, 4.72 (ABq, *J*=15.1 Hz, 3, 2 H), 4.88, 5.10 (ABq, *J*=12.1 Hz, 3, 2 H) | 19.24 (3), 21.45 (3), 28.00 (2), 52.01 (2), 55.01 (2), 67.43 (2), 81.62 (3), 154.90 (3), 155.90 (2) |
| **3ca** | Ref. 11 | 97 | 1.16 (s, 4, 9 H), 1.20 (t, 2, 3 H), 3.52-3.69, 3.96-4.16, 4.40-4.78 and 5.10-5.30 (compl. sign., together 8 H) | 14.04, 27.68 (3), 53.02 (4), 53.98 (4), 60.94 (3), 68.00 (4), 81.82 (4), 154.28 (4), 155.70 (4), 168.84 (3) |
| **3cb** | Ref. 11 | 88 | 1.21 (s, 4, 9 H), 4.34, 4.38 (ABq, *J*=14.7 Hz, 4, 2 H), 4.41, 4.52 (ABq, *J*=14.6 Hz, 4, 2 H), 4.89, 5.11 (ABq, *J*=12.1 Hz, 4, 2 H)*d* | 27.83 (3), 52.54 (4), 53.79 (4), 67.99 (4), 81.47 (3), 154. 72 (4), 156.17 (4)e |
| **3cc** | Typical procedure | 91 | 1.21 (s, 4, 9 H), 4.32, 4.36 (ABq, *J*=14.5 Hz, 4, 2 H), 4.40, 4.53 (ABq, *J*=14.6 Hz, 4, 2 H), 4.88, 5.11 (ABq, *J*=12.1 Hz, 4, 2 H) | 27.83 (3), 52.62 (4), 53.80 (4), 68.00 (3), 81.50 (3), 154.72 (4), 156.17 (4) |
| *a* All compounds are oils except **3ab**: mp 55-55.5 C (from light petroleum, -20 C). Anal. Found: C, 62.2; H, 6.3; N, 6.9. Calc. for C21H25ClN2O4: C, 62.30; H, 6.22; N, 6.92. *b* Aromatic signals (6.75H7.40 and 120C137 ppm) omitted. *c* Only shifts of main conformer are given. Number of distinguishable conformers are given within brackets after the multiplicity. Integrals refer to all conformers. *d* 1H NMR spectrum included in Supplementary information. *e* 13C NMR spectrum included in Supplementary information. | | | | |
